# Supplementary material for: Glucose starvation induces cell death in K-ras-transformed cells by interfering with the hexosamine biosynthesis pathway and activating the unfolded protein response
Source: PubMed Central journal article supplement — Cell Death Dis. 2013 Jul 18;4(7):e732–. doi: 10.1038/cddis.2013.257 (PMC3730427; doi:10.1038/cddis.2013.257), 2013-07-18
Supplement: cddis2013257x4.pdf [file cddis2013257x4.pdf]

| Spot number | Description                                                                              | UniProt KB entry | Gene name | Theoretical pI | Theoretical MW | MASCOT protein score | Coverage (%) | Matched/s earched peaks | MSMS                      | MS/MS score | m/z       | z |
|-------------|------------------------------------------------------------------------------------------|------------------|-----------|----------------|----------------|----------------------|--------------|-------------------------|---------------------------|-------------|-----------|---|
| 1           | Vinculin                                                                                 | Q64727           | VCL       | 5.77           | 116586.17      | 160                  | 23.3         | 18/28                   | 179QQLTHQEHRR188          | 57          | 1305.6350 | 1 |
| 2           | Heat shock protein 90, beta (Grp94), member 1                                            | P08113           | HSP90B1   | 4.72           | 90096.75       | 214                  | 27.1         | 22/28                   | 385SILFVPTSAPR395         | 63          | 1187.7090 | 1 |
| 3           | Gelsolin                                                                                 | P13020           | GSN       | 5.72           | 83344.38       | 107                  | 18.1         | 11/21                   | 176HVVPNEVVVQR166         | 38          | 1275.7180 | 1 |
| 4           | Gelsolin                                                                                 | P13020           | GSN       | 5.72           | 83344.38       | 87                   | 14.2         | 9/19                    | 176HVVPNEVVVQR166         | 55          | 1275.7371 | 1 |
| 5           | Glycyl-tRNA synthetase                                                                   | Q9CZD3           | GARS      | 6.24           | 81877.77       | 99                   | 15.6         | 8/11                    | 309LPFAAAQIGNSFR321       | 87          | 1391.7400 | 1 |
| 6           | Stress-70 protein, mitochondrial                                                         | P38647           | HSPA9     | 5.50           | 68612.84       | 274                  | 39.9         | 22/25                   | 188NAVITVPAYFNDSQR202     | 88          | 1694.8590 | 1 |
| 7           | Transketolase                                                                            | P40142           | TKT       | 7.23           | 67630.48       | 104                  | 25.0         | 9/15                    | 111LDNLVAIFDINR122        | 86          | 1402.7660 | 1 |
| 8           | Calreticulin                                                                             | P14211           | CALR      | 4.33           | 46347.39       | 134                  | 36.3         | 10/19                   | 25EQFLDGDWNTNR358         | 87          | 1451.6730 | 1 |
| 9           | T-complex protein 1 subunit alpha                                                        | P11983           | TCP1      | 5.82           | 60448.64       | 208                  | 30.9         | 17/26                   | 434EQLAIAEFAR443          | 54          | 1147.6190 | 1 |
| 10          | Chaperonin containing Tcp1, subunit 5 (epsilon)                                          | P80316           | CCT5      | 5.72           | 59492.89       | 210                  | 48.1         | 18/31                   | 353LGFAGVQVEISFGTTK358    | 104         | 1653.8910 | 1 |
| 11          | Peptidyl-prolyl cis-trans isomerase FKBP4 (FK506-binding protein 4)                      | P30416           | FKBP4     | 5.54           | 51572.38       | 125                  | 29.5         | 11/18                   | 235FQIPPHAEELR244         | 56          | 1207.6520 | 1 |
| 12          | Protein disulfide isomerase associated 4                                                 | P09103           | PDIA4     | 4.72           | 55090.04       | 210                  | 37.3         | 18/29                   | 84VDATEESDLAQQYGVRR99     | 134         | 1780.8490 | 1 |
| 13          | Chaperonin containing Tcp1, subunit 2 (beta)                                             | P80314           | CCT2      | 5.98           | 57346.04       | 104                  | 23.6         | 12/20                   | 377GATQQILDEAER388        | 93          | 1330.6630 | 1 |
| 14          | RuvB-like protein 2                                                                      | Q9WMT5           | RUVBL2    | 5.49           | 50981.32       | 279                  | 51.0         | 21/27                   | 429VYSLFDDESRR438         | 49          | 1228.6190 | 1 |
| 15          | Vimentin                                                                                 | P20152           | VIM       | 5.05           | 53556.48       | 180                  | 44.8         | 17/29                   | 326EMEENFALEAANYQDTIGR344 | 181         | 2201.0110 | 1 |
| 16          | Vimentin                                                                                 | P20152           | VIM       | 5.05           | 53556.48       | 251                  | 48.0         | 24/34                   | 345LQDEIQNMKEEMAR358      | 101         | 1734.8270 | 1 |
| 17          | Eukaryotic translation initiation factor 4A1                                             | Q4FZL1           | EIF4A1    | 5.32           | 46153.93       | 95                   | 23.9         | 13/26                   | 147LQMEAPHIVGTGPR161      | 70          | 1618.9110 | 1 |
| 18          | Vimentin                                                                                 | P20152           | VIM       | 5.05           | 53556.48       | 256                  | 50.7         | 22/31                   | 345LQDEIQNMKEEMAR358      | 118         | 1734.8580 | 1 |
| 19          | Serine (or cysteine) peptidase inhibitor, clade B, member 6a                             | Q60854           | SERPINB6A | 5.53           | 42598.91       | 196                  | 40.7         | 16/20                   | 84TGTQYLLR91              | 35          | 951.5470  | 1 |
| 20          | Phosphoglycerate kinase 1                                                                | P09411           | PGK1      | 8.02           | 44419.28       | 156                  | 41.2         | 13/18                   | 157LGDVYVNDAFGTAAHR171    | 140         | 1634.7990 | 1 |
| 21          | Fructose-bisphosphate aldolase A                                                         | P05064           | ALDOA     | 8.40           | 39224.74       | 220                  | 56.3         | 16/20                   | 88ADDGRPFQVQIK99          | 83          | 1342.7170 | 1 |
| 22          | Acetyl-Coenzyme A acetyltransferase 2                                                    | Q8CAY6           | ACAT2     | 7.16           | 41297.73       | 122                  | 31.5         | 8/13                    | 195AGHFDKEIVPVLVSSR210    | 120         | 1753.9611 | 1 |
| 23          | Acetyl-Coenzyme A acetyltransferase 2                                                    | Q8CAY6           | ACAT2     | 7.16           | 41297.73       | 175                  | 40.8         | 12/17                   | 195AGHFDKEIVPVLVSSR210    | 145         | 1753.9580 | 1 |
| 24          | Protein phosphatase 1, catalytic subunit, alpha isoform                                  | P62137           | PPP1CA    | 5.94           | 37408.90       | 201                  | 39.4         | 14/19                   | 60LGGDIHQYDILLR73         | 72          | 1722.8361 | 1 |
| 25          | Annexin A1 (Lipocortin I)                                                                | P10107           | ANXA1     | 7.15           | 38603.11       | 113                  | 33.5         | 9/18                    | 114TPAQFDADLR124          | 41          | 1262.6021 | 1 |
| 26          | Annexin A3                                                                               | Q35639           | ANXA3     | 5.50           | 36252.90       | 219                  | 53.9         | 18/40                   | 14DYPGFSPSVDAAAIR28       | 116         | 1623.7889 | 1 |
| 27          | Glyceraldehyde-3-phosphate dehydrogenase                                                 | P16858           | GAPDH     | 8.45           | 35678.82       | 116                  | 25.5         | 9/16                    | 308LISWYDNEYGYSNR321      | 101         | 1779.8101 | 1 |
| 28          | Lactate dehydrogenase A                                                                  | P06151           | LDHA      | 7.76           | 36367.34       | 134                  | 32.5         | 12/20                   | 213SLNPELGTADADKEQWK228   | 107         | 1830.8890 | 1 |
| 29          | Annexin A5                                                                               | P48036           | ANXA5     | 4.82           | 35752.44       | 175                  | 34.8         | 12/15                   | 5GTVTDFPFGDGR16           | 78          | 1268.5900 | 1 |
| 30          | Esterase D/formylglutathione hydrolase                                                   | Q9R0P3           | ESD       | 6.70           | 31319.58       | 95                   | 27.7         | 7/17                    | 65SGYQQAASEHGLVVIAPDTSR86 | 183         | 2283.1570 | 1 |
| 31          | Voltage-dependent anion channel 1                                                        | Q60932           | VDAC1     | 8.55           | 32351.49       | 158                  | 39.2         | 10/16                   | 243YQVDPDACFSAK254        | 55          | 1400.6250 | 1 |
| 32          | Guanine nucleotide binding protein (G protein), beta polypeptide 2 like 1 (Gnb2l1), mRNA | P68040           | GNB2L1    | 7.57           | 34945.54       | 178                  | 46.1         | 11/15                   | 140YTVQDESHSEWVSCVR155    | 145         | 1981.8610 | 1 |
| 33          | Proteasome (prosome, macropain) subunit, alpha type 1                                    | Q9R1P4           | PSMA1     | 6.00           | 29546.54       | 86                   | 24.7         | 7/8                     | 4NQYDNDVTWVSPQGR18        | 101         | 1778.8210 | 1 |
| 34          | Glutathione S-transferase omega 1                                                        | O09131           | GSTO1     | 6.91           | 27497.62       | 105                  | 35.4         | 9/17                    | 12GSAPPGPVPEGQIR25        | 92          | 1361.7330 | 1 |
| 35          | Chloride intracellular channel 1                                                         | Q9Z1Q5           | CLIC1     | 5.09           | 26881.63       | 134                  | 50.6         | 9/19                    | 209YLSNAYAR216            | 57          | 957.4930  | 1 |
| 36          | Lectin, galactose binding, soluble 3                                                     | Q8C253           | LGALS3    | 8.58           | 27414.73       | 120                  | 29.5         | 10/19                   | 225VAVNDHALLQYNHR238      | 109         | 1649.8550 | 1 |
| 37          | Methylthioadenosine phosphorylase                                                        | Q9CQ65           | MTAP      | 6.78           | 30930.69       | 132                  | 31.4         | 10/13                   | 134GVCHIPMAEPFCPK147      | 84          | 1642.7660 | 1 |
| 38          | Proteasome subunit alpha type-4                                                          | Q9R1P0           | PSMA4     | 7.58           | 29470.77       | 86                   | 28.5         | 6/12                    | 55LLDEVFSEK64             | 60          | 1226.6300 | 1 |
| 39          | Peroxiredoxin 4                                                                          | O08807           | PRDX4     | 5.83           | 26476.01       | 120                  | 40.1         | 8/16                    | 190DYGVYLEDGSHTLR203      | 104         | 1624.7700 | 1 |
| 40          | Peroxiredoxin 6                                                                          | O08709           | PRDX6     | 5.72           | 24739.45       | 230                  | 66.5         | 13/17                   | 42DFTPVCTTELGR53          | 72          | 1395.6610 | 1 |
| 41          | triosephosphate isomerase 1                                                              | P17751           | TPI1      | 5.56           | 32191.76       | 136                  | 41.4         | 10/23                   | 86DLGATVVVVLGHSESR99      | 87          | 1539.7810 | 1 |
| 42          | RAN GTPase activating protein 1                                                          | P62826           | RANGAP1   | 7.20           | 24291.91       | 161                  | 40.3         | 11/21                   | 61FNWVDTAGQEK71           | 67          | 1294.6140 | 1 |
| 43          | Superoxide dismutase [Mn], mitochondrial                                                 | P09671           | SOD2      | 7.30           | 22222.14       | 76                   | 33.0         | 6/22                    | 54HHAAYVNNLNATEEK68       | 111         | 1710.8270 | 1 |
| 44          | Peroxiredoxin 1                                                                          | P35700           | PRDX1     | 8.26           | 22176.50       | 201                  | 59.8         | 14/22                   | 129GLFIIDDKILR140         | 89          | 1359.7870 | 1 |
| 45          | Peptidyl-prolyl cis-trans isomerase A                                                    | P17742           | PPIA      | 7.88           | 17840.15       | 147                  | 63.4         | 11/19                   | 77SIYGEKFEDENFILK91       | 115         | 1831.9290 | 1 |

### Supplementary Table 3

Protein identification by Peptide Mass Fingerprint (PMF). For each identified spot mass spectrometry parameters are reported (average ratio, MW and pI, MASCOT score, protein coverage, n° matched over searched peaks, the sequence of the fragmented peptide and its MS/MS score, mass (m)/charge (z) ratio and charge status (z)), along with recommended protein name and Uniprot Knowledgebase accession number. To confirm identification, a MS/MS spectrum per protein was collected by MALDI ToF/ToF, as acceptance criterium.
