# Supplementary material for: Glucose starvation induces cell death in K-ras-transformed cells by interfering with the hexosamine biosynthesis pathway and activating the unfolded protein response
Source: PubMed Central journal article supplement — Cell Death Dis. 2013 Jul 18;4(7):e732–. doi: 10.1038/cddis.2013.257 (PMC3730427; doi:10.1038/cddis.2013.257), 2013-07-18
Supplement: cddis2013257x5.pdf [file cddis2013257x5.pdf]

| Spot number                          | Description                                                                              | UniProt KB entry | Gene name | % of spot volume variation |              |
|--------------------------------------|------------------------------------------------------------------------------------------|------------------|-----------|----------------------------|--------------|
|                                      |                                                                                          |                  |           | N72L vs K72L               | N72H vs K72H |
| <b>Metabolism</b>                    |                                                                                          |                  |           |                            |              |
| 7                                    | Transketolase                                                                            | P40142           | TKT       |                            | - 27         |
| 20                                   | Phosphoglycerate kinase 1                                                                | P09411           | PGK1      | 50                         | 71           |
| 21                                   | Fructose-bisphosphate aldolase A                                                         | P05064           | ALDOA     | 60                         | 80           |
| 27                                   | Glyceraldehyde-3-phosphate dehydrogenase                                                 | P16858           | GAPDH     | 22                         | 44           |
| 28                                   | Lactate dehydrogenase A                                                                  | P06151           | LDHA      | 58                         | 70           |
| 41                                   | triosephosphate isomerase 1                                                              | P17751           | TPI1      | 64                         | 71           |
| <b>Aminoacid/lipid metabolism</b>    |                                                                                          |                  |           |                            |              |
| 22                                   | Acetyl-Coenzyme A acetyltransferase 2                                                    | Q8CAY6           | ACAT2     | 62                         | 62           |
| 23                                   | Acetyl-Coenzyme A acetyltransferase 2                                                    | Q8CAY6           | ACAT2     | 32                         | 121          |
| 37                                   | Methylthioadenosine phosphorylase                                                        | Q9CQ65           | MTAP      | 68                         | 52           |
| <b>Protein synthesis and folding</b> |                                                                                          |                  |           |                            |              |
| 5                                    | Glycyl-tRNA synthetase                                                                   | Q9CZD3           | GARS      |                            | 37           |
| 8                                    | Calreticulin                                                                             | P14211           | CALR      | - 30                       | - 39         |
| 9                                    | T-complex protein 1 subunit alpha                                                        | P11983           | TCP1      |                            | 37           |
| 10                                   | Chaperonin containing Tcp1, subunit 5 (epsilon)                                          | P80316           | CCT5      | 40                         | 39           |
| 11                                   | Peptidyl-prolyl cis-trans isomerase FKBP4 (FK506-binding protein 4)                      | P30416           | FKBP4     | 40                         | 49           |
| 12                                   | Protein disulfide isomerase associated 4                                                 | P09103           | PDIA4     |                            | - 36         |
| 13                                   | Chaperonin containing Tcp1, subunit 2 (beta)                                             | P80314           | CCT2      |                            | 31           |
| 17                                   | Eukaryotic translation initiation factor 4A1                                             | Q4FZL1           | EIF4A1    |                            | 38           |
| 45                                   | Peptidyl-prolyl cis-trans isomerase A                                                    | P17742           | PPIA      |                            | 23           |
| <b>Stress response</b>               |                                                                                          |                  |           |                            |              |
| 2                                    | Heat shock protein 90, beta (Grp94), member 1                                            | P08113           | HSP90B1   | 21                         |              |
| 6                                    | Stress-70 protein, mitochondrial                                                         | P38647           | HSPA9     |                            | - 10         |
| 19                                   | Serine (or cysteine) peptidase inhibitor, clade B, member 6a                             | Q60854           | SERPINB6A | - 26                       | - 32         |
| 30                                   | Esterase D/formylglutathione hydrolase                                                   | Q9R0P3           | ESD       | 87                         | 49           |
| 33                                   | Proteasome (prosome, macropain) subunit, alpha type 1                                    | Q9R1P4           | PSMA1     | 27                         |              |
| 34                                   | Glutathione S-transferase omega 1                                                        | O09131           | GSTO1     | 79                         | 57           |
| 39                                   | Peroxiredoxin 4                                                                          | O08807           | PRDX4     |                            | 33           |
| 40                                   | Peroxiredoxin 6                                                                          | O08709           | PRDX6     | 37                         |              |
| 43                                   | Superoxide dismutase [Mn], mitochondrial                                                 | P09671           | SOD2      | 51                         | 30           |
| 44                                   | Peroxiredoxin 1                                                                          | P35700           | PRDX1     | 45                         | 35           |
| <b>Structural proteins</b>           |                                                                                          |                  |           |                            |              |
| 1                                    | Vinculin                                                                                 | Q64727           | VCL       | - 62                       | - 50         |
| 3                                    | Gelsolin                                                                                 | P13020           | GSN       | - 41                       | - 54         |
| 4                                    | Gelsolin                                                                                 | P13020           | GSN       | - 48                       | - 53         |
| 15                                   | Vimentin                                                                                 | P20152           | VIM       | 69                         | 39           |
| 16                                   | Vimentin                                                                                 | P20152           | VIM       | 106                        | 124          |
| 18                                   | Vimentin                                                                                 | P20152           | VIM       | 125                        | 183          |
| 36                                   | Lectin, galactose binding, soluble 3                                                     | Q8C253           | LGALS3    |                            | - 31         |
| <b>Other</b>                         |                                                                                          |                  |           |                            |              |
| 14                                   | RuvB-like protein 2                                                                      | Q9WTM5           | RUVBL2    |                            | 57           |
| 24                                   | Protein phosphatase 1, catalytic subunit, alpha isoform                                  | P62137           | PPP1CA    |                            | 27           |
| 25                                   | Annexin A1 (Lipocortin I)                                                                | P10107           | ANXA1     | - 23                       |              |
| 26                                   | Annexin A3                                                                               | O35639           | ANXA3     | - 59                       | - 52         |
| 29                                   | Annexin A5                                                                               | P48036           | ANXA5     | 65                         | 84           |
| 31                                   | Voltage-dependent anion channel 1                                                        | Q60932           | VDAC1     |                            | - 25         |
| 32                                   | Guanine nucleotide binding protein (G protein), beta polypeptide 2 like 1 (Gnb2l1), mRNA | P68040           | GNB2L1    |                            | 16           |
| 35                                   | Chloride intracellular channel 1                                                         | Q9Z1Q5           | CLIC1     |                            | 46           |
| 38                                   | Proteasome subunit alpha type-4                                                          | Q9R1P0           | PSMA4     |                            | 19           |
| 42                                   | RAN GTPase activating protein 1                                                          | P62826           | RANGAP1   | 40                         | 40           |

## Supplementary Table 4

KEGG pathway classification of identified proteins. The two columns on the right indicate the percentage of protein spot variation as measured on 2-DIGE gels.
